# Supplementary material for: Cognitive–behavioral therapy-based intervention to treat symptoms of anxiety in pregnancy in a prenatal clinic using non-specialist providers in Pakistan: design of a randomised trial
Source: PubMed Central journal article supplement — BMJ Open. 2020 Apr 15;10(4):e037590. doi: 10.1136/bmjopen-2020-037590 (PMC7200036; doi:10.1136/bmjopen-2020-037590), 2020-04-15
Supplement: bmjopen-2020-037590.reviewer_comments.pdf [file bmjopen-2020-037590.reviewer_comments.pdf]

## PEER REVIEW HISTORY

BMJ Open publishes all reviews undertaken for accepted manuscripts. Reviewers are asked to complete a checklist review form (<http://bmjopen.bmj.com/site/about/resources/checklist.pdf>) and are provided with free text boxes to elaborate on their assessment. These free text comments are reproduced below.

## ARTICLE DETAILS

|                            |                                                                                                                                                                                           |
|----------------------------|-------------------------------------------------------------------------------------------------------------------------------------------------------------------------------------------|
| <b>TITLE (PROVISIONAL)</b> | A Cognitive Behavioral Therapy-based intervention to treat symptoms of anxiety in pregnancy in a prenatal clinic using non-specialist providers in Pakistan: design of a randomized trial |
| <b>AUTHORS</b>             | Surkan, Pamela; Hamdani, Syed Usman; Huma, Zill-e; Nazir, Huma; Atif, Najia; Rowther, Armaan; Chaudhri, Rizwana; Zafar, Shamsa; Mullany, Luke; Malik, Abid; Rahman, Atif                  |

This article was not externally reviewed at BMJ Open. Protocols that have been independently assessed prior to submission to BMJ Open are usually fast-tracked to publication on the grounds that further substantial changes will not be possible. This independent assessment will usually be external, independent review for both a substantial grant award from a non-commercial or government funder and ethics approval.
